# Supplementary material
Source: PubMed Central journal article supplement (PMC5818821)
Supplement: jamainternmed-177-774-s002.pdf [file jamainternmed-177-774-s002.pdf]

## Supplementary Online Content

Cowley NJ, Owen A, Shiels SC, et al. Safety and efficacy of antiviral therapy for prevention of cytomegalovirus reactivation in immunocompetent critically ill patients: a randomized clinical trial. *JAMA Intern Med*. Published online April 24, 2017. doi:10.1001/jamainternmed.2017.0895

**eTable 1.** Study Drug Adjustment for Renal Impairment

**eTable 2.** Patient Baseline Characteristics

This supplementary material has been provided by the authors to give readers additional information about their work.

**eTable 1. Study Drug Adjustment for Renal Impairment**

| <b>Cr<sub>Cl</sub> (ml/min)</b> | <b>Valaciclovir</b> | <b>Aciclovir</b> | <b>Valganciclovir</b> | <b>Ganciclovir</b>   |
|---------------------------------|---------------------|------------------|-----------------------|----------------------|
| >75                             | 2g qds              | 10mg/kg tds      | 450mg od              | 2.5mg/kg od          |
| 51-75                           | 1.5g qds            | 10mg/kg tds      | 450mg alt. days       | 1.25mg/kg od         |
| 26-50                           | 1.5g tds            | 10mg/kg bd       | 450mg twice weekly    | 0.625mg/kg od        |
| 10-25                           | 1.5g bd             | 10mg/kg od       | 225mg twice weekly    | 0.625mg/kg alt. days |
| <10 HD                          | 1.5g od             | 5mg/kg od        | 225mg after HD        | 0.625mg/kg after HD  |
| <10 CVVH                        | 1.5g od             | 5mg/kg od        | 225mg twice weekly    | 0.625mg/kg od        |

Cr<sub>Cl</sub>=Creatinine clearance using Cockcroft-Gault formula; HD=haemodialysis; CVVH=Continuous venovenous haemofiltration; od=once daily; bd= twice daily; tds= three times daily; qds=four times daily; alt=alternate.

**eTable 2. Patient Baseline Characteristics**

|                                                                        |                                   | Control<br>(N=44) | Valaciclovir<br>(N=34) | Valganciclovir<br>(N=46) |
|------------------------------------------------------------------------|-----------------------------------|-------------------|------------------------|--------------------------|
| Age (years)                                                            | Mean (SD)                         | 55 (17)           | 58 (17)                | 57 (17)                  |
|                                                                        | Range                             | (21 – 88)         | (24 – 82)              | (20 – 86)                |
| Sex                                                                    | Male (%)                          | 23 (52)           | 24 (71)                | 31 (67)                  |
|                                                                        | Female (%)                        | 21 (48)           | 10 (29)                | 15 (33)                  |
| Body Mass Index<br>(kg/m <sup>2</sup> )                                | Median (IQR)                      | 27 (24 - 31)      | 26 (22 - 28)           | 27 (24 - 29)             |
|                                                                        | Range                             | (18 – 55)         | (15 – 50)              | (20 – 37)                |
| Diagnosis category at enrolment                                        |                                   |                   |                        |                          |
|                                                                        | Trauma                            | 10                | 11                     | 10                       |
|                                                                        | Infection (respiratory)           | 5                 | 5                      | 8                        |
|                                                                        | Thromboembolic/vascular           | 5                 | 5                      | 5                        |
|                                                                        | Emergency general surgery         | 3                 | 4                      | 6                        |
|                                                                        | Cardiac arrest                    | 6                 | 4                      | 2                        |
|                                                                        | Cerebrovascular / cerebral injury | 3                 | 1                      | 5                        |
|                                                                        | Infection (other)                 | 5                 | 1                      | 1                        |
|                                                                        | Respiratory failure               | 2                 | 0                      | 2                        |
|                                                                        | Liver failure                     | 1                 | 1                      | 2                        |
|                                                                        | Poisoning                         | 2                 | 1                      | 1                        |
|                                                                        | Burn injury                       | 1                 | 0                      | 2                        |
|                                                                        | Elective general surgery          | 1                 | 1                      | 1                        |
|                                                                        | Other                             | 0                 | 0                      | 1                        |
| Length of Hospital Stay Prior to<br>Randomisation (days)*              | Median (IQR)                      | 5 (3 - 7)         | 5 (2 - 6)              | 5 (3 - 6)                |
|                                                                        | Range                             | (1 – 9)           | (1 – 21)               | (2 – 8)                  |
| Length of ICU Stay Prior to<br>Randomisation (days)**                  | Median (IQR)                      | 4 (2 - 6)         | 4 (2 - 5)              | 4 (2 - 5)                |
|                                                                        | Range                             | (1 – 7)           | (1 – 7)                | (1 – 7)                  |
| Duration of Mechanical Ventilation<br>prior to Randomisation (days)*** | Median (IQR)                      | 3 (2 - 5.5)       | 4 (2 - 5)              | 3 (2 - 5)                |
|                                                                        | Range                             | (1 – 7)           | (1 – 7)                | (0 – 8)                  |
| APACHE II score on ICU admission                                       | N                                 | 41                | 32                     | 43                       |
|                                                                        | Mean (SD)                         | 17.5 (7.0)        | 17.9 (4.6)             | 17.4 (6.3)               |
|                                                                        | Range                             | (3 – 42)          | (9 – 26)               | (6 – 34)                 |
| SOFA score (on day 1)                                                  | Median (IQR)                      | 8.5 (6.5 - 13.0)  | 8.5 (5.0 - 12.0)       | 8.0 (5.0 - 11.0)         |
|                                                                        | Range                             | (2 – 18)          | (3 – 18)               | (2 – 20)                 |
| White Cell Count (x10 <sup>9</sup> /L) (on day 1)                      | Mean (SD)                         | 12.5 (6.1)        | 12.7 (5.5)             | 11.3 (7.2)               |
|                                                                        | Range                             | (5.1 – 28.9)      | (4.3 – 25.5)           | (2.8 – 44.4)             |

SD=Standard deviation; IQR=Interquartile Range; ICU=Intensive Care Unit; APACHE II= Acute Physiology and Chronic Health Evaluation II; SOFA score=Sequential Organ Failure Assessment score;

\* defined as number of days between date of hospital admission and date of randomisation.

\*\* defined as number of days between date of ICU admission and date of randomisation.

\*\*\* defined as number of days between date of endotracheal intubation and date of randomisation.
